# Supplementary material for: Anti-Inflammatory Neutrophils Reprogram Macrophages toward a Pro-Healing Phenotype with Increased Efferocytosis Capacity
Source: MDPI journal article supplement (doi:10.3390/cells13030208), 2024-01-23
Supplement: s1 [file s1]

## Supplementary material

### Supplementary table S1:

**Table S1.** The sequences of oligonucleotide primers used for evaluation of gene expression.

| Gene<br>(Human)     | Sequences of Oligonucleotide Primers             |
|---------------------|--------------------------------------------------|
| TNF $\alpha$        | GGTGCCTATGTCTCAGCCTCT<br>CATCGGCTGGCACCAGTAGTT   |
| IL1 $\beta$         | AGAGTGGAGCCTGGTCTTACA<br>CCTTTGCTGACAATAAGCACTGG |
| S100A8              | ATGCCGTCTACAGGGATGAC<br>ACTGAGGACACTCGGTCTCTA    |
| S100A9              | TCCTCGGCTTTGACAGAGTG<br>GCCCCAGCTTCACAGAGTAT     |
| CD206               | GGGTTGCTATCACTCTCTATGC<br>TTTCTTGTCTGTTGCCGTAGTT |
| IL10                | GCTCTTACTGACTGGCATGAG<br>CGCAGCTCTAGGAGCATGTG    |
| TGF- $\beta$        | CAAGCAGAGTACACACAGCAT<br>TGCTCCACTTTTAACTTGAGCC  |
| MerTK               | CTCTGGCGTAGAGCTATCACT<br>AGGCTGGGTGTTGGTGAAAACA  |
| CD36                | AAGCCAGGTATTGCAGTTCTTT<br>GCATTTGCTGATGTCCAGCACA |
| CX3CR1              | CACACCGTCATCAGCATTGA<br>GGTAGTCACCAAGGCATTTCATT  |
| Integrin $\alpha$ v | GCTGTCGGAGATTTCAATGGT<br>TCTGCTCGCCAGTAAAATTGT   |
| Integrin $\beta$ 5  | GGAAGTTCGGAAACAGAGGGT<br>CTTTCGCCAGCCAATCTTCTC   |
| MFG-E8              | CCTGCCACAACGGTGGTTTAT<br>CACATTTTCGTCTCACAGTGGTT |
| KLF                 | CAGCTTCACCTATCCGATCCG<br>GACTCCCTGCCATAGAGGAGG   |
| PPAR $\gamma$       | ACCAAAGTGCAATCAAAGTGGA<br>ATGAGGGAGTTGGAAGGCTCT  |
| Nur77               | GGCTCGGGGATACTGGATACA<br>CTGGCATGAAGCGTTGTCC     |

*i) Inflammatory Markers*

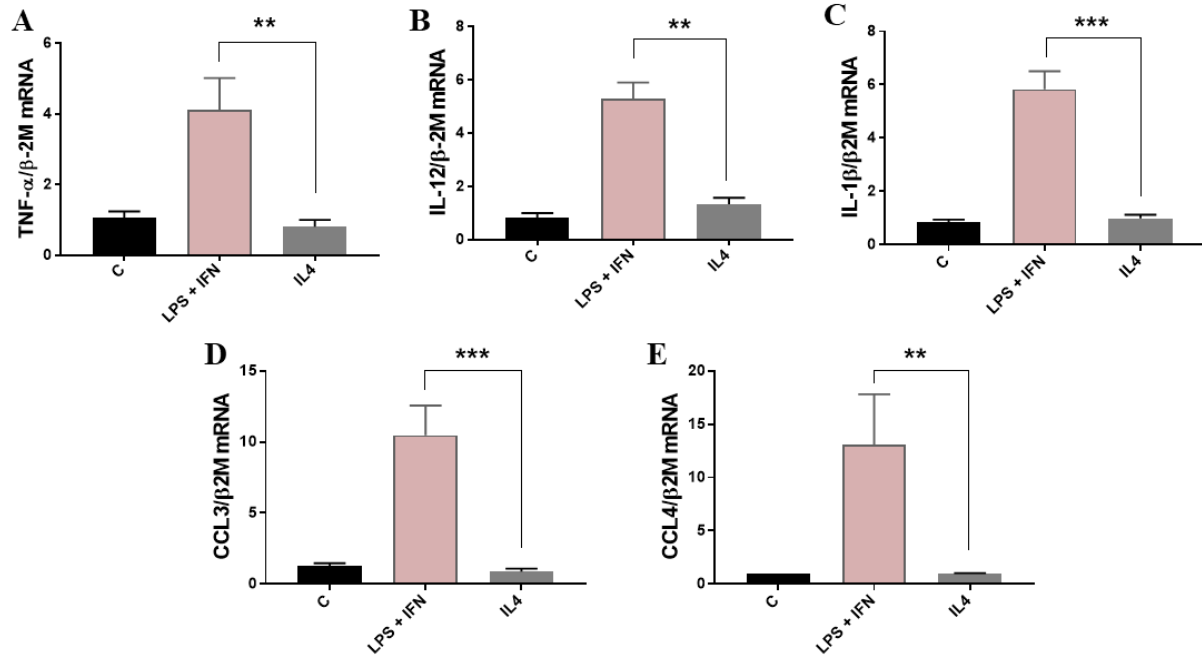

*ii) Anti-inflammatory Markers*

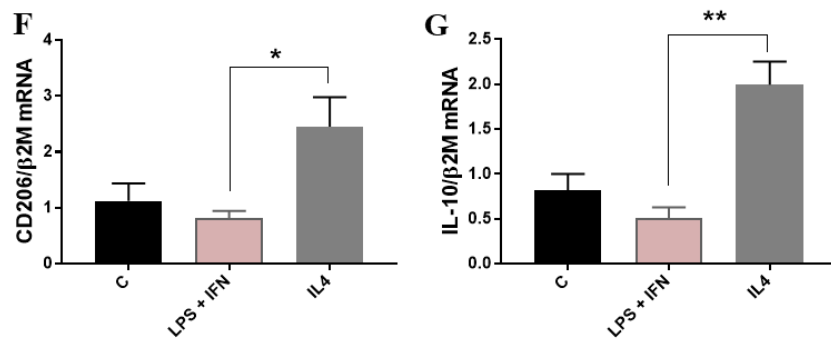

**Supplementary Figure S1. Inflammatory/anti-inflammatory markers in human neutrophils polarized in N1 or in N2 neutrophils.** A – E. Gene expression of inflammatory markers TNF $\alpha$ , IL-12, IL-1 $\beta$ , CCL3, and CCL4 in human neutrophils polarized for 2h with LPS+IFN $\gamma$  (N1) or IL-4 (N2), and in control neutrophils (C). F, G. Gene expression of anti-inflammatory markers IL-10 and CD206, in N1, N2 and C neutrophils. n=5, \*p<0.05, \*\*p<0.01, \*\*\*p<0.001, (N1 vs. N2).

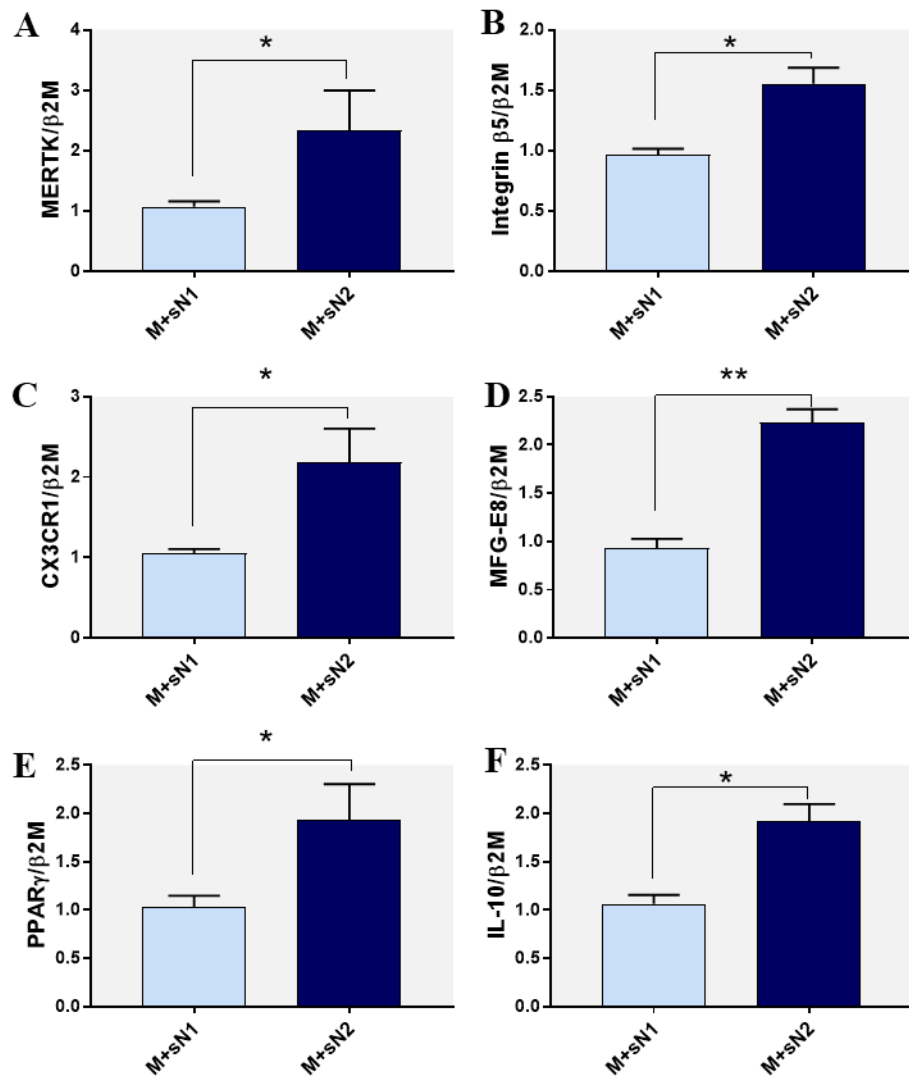

**Supplementary Figure S2. Effect of N1/N2 neutrophil secretome on human macrophages derived from U937 monocytic line.** A – C. Gene expression of receptors involved in efferocytosis process MerTK, integrin  $\beta 5$ , and CX3CR1; D. Gene expression of MFG-E8 bridge molecule; E. Gene expression of PPAR $\gamma$  transcription factor, and F. Gene expression of IL-10 anti-inflammatory molecule in macrophages derived from U937 exposed to N1/N2 conditioned media. n=2 (2 experiments with 2 wells/experiment), \*p<0.05, \*\*p<0.01, (N1 vs. N2).

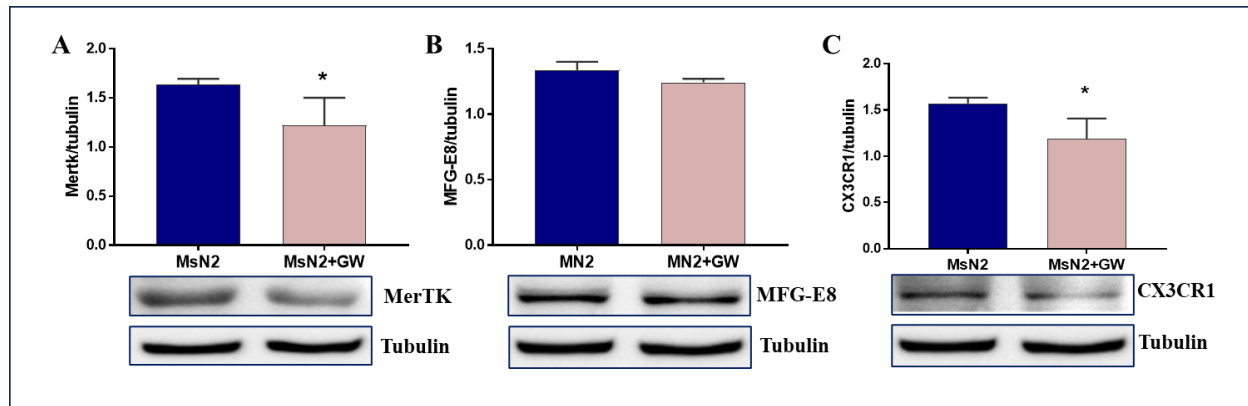

**Supplementary Figure S3. *PPAR $\gamma$*  inhibitor GW9662 reduces the expression of MerTK and CX3CR1 efferocytosis receptors.** (A, C) Protein expression of MerTK, MFG-E8, and CX3CR1 in lysate of macrophages exposed to sN2 in the absence (MN2) or presence of 10 $\mu$ M GW9662 inhibitor (MN2+GW). The data represent mean  $\pm$  SD from three different experiments, \* $p$ <0.05.
